# Supplementary material for: MicroRNAs in Hyperglycemia Induced Endothelial Cell Dysfunction
Source: PubMed Central journal article supplement (PMC4848974; doi:10.3390/ijms17040518), 2016-04-07
Supplement: ijms-17-00518-s001.pdf [file ijms-17-00518-s001.pdf]

## Supplementary Materials: MicroRNAs in Hyperglycemia Induced Endothelial Cell Dysfunction

Maskomani Silambarasan, Jun Rong Tan, Dwi Setyowati Karolina, Arunmozhiarasi Armugam, Charanjit Kaur and Kandiah Jeyaseelan

**Table S1.** miRNA microarray results from HUVECs cells subjected to different hyperglycemic conditions and treatment intervals. Fold change values with statistical significance ( $p < 0.05$ ) in expression are shown below. The values were normalized against control where the cells were treated with 5 mM glucose for different time intervals.

| hsa-miRNA                 | 5 mM          | 10 mM | 25 mM | 40 mM | hsa-miRNA | 5 mM                      | 10 mM                | 25 mM | 40 mM |      |      |
|---------------------------|---------------|-------|-------|-------|-----------|---------------------------|----------------------|-------|-------|------|------|
| Glucose treatment for 6 h |               |       |       |       | 38        | miR-192-5p #              | 1.00                 | 1.26  | 1.45  | 1.97 |      |
| 1                         | miR-1260a     | 1.00  | 1.49  | 1.95  | 2.33      | 39                        | miR-20b-5p #         | 1.00  | 1.56  | 1.68 | 1.81 |
| 2                         | miR-1270      | 1.00  | 2.03  | 2.42  | 3.80      | 40                        | miR-219a-1-3p        | 1.00  | 1.87  | 1.88 | 2.81 |
| 3                         | miR-20b-5p #  | 1.00  | 1.96  | 2.05  | 2.23      | 41                        | miR-221-3p #         | 1.00  | 1.11  | 1.27 | 1.41 |
| 4                         | miR-376a-3p   | 1.00  | 1.80  | 1.91  | 2.11      | 42                        | miR-222-3p           | 1.00  | 1.06  | 1.11 | 1.52 |
| 5                         | miR-570-3p #  | 1.00  | 1.19  | 3.40  | 5.48      | 43                        | miR-26a-5 p#         | 1.00  | 1.13  | 1.27 | 1.84 |
| 6                         | miR-616-3p    | 1.00  | 1.20  | 1.69  | 2.91      | 44                        | miR-26b-5p #         | 1.00  | 1.10  | 1.23 | 1.44 |
| Glucose treatment for 12h |               |       |       |       | 45        | miR-29b-3p #              | 1.00                 | 1.25  | 1.69  | 2.42 |      |
| 7                         | miR-1267      | 1.00  | 1.38  | 2.39  | 2.59      | 46                        | miR-29c-3p #         | 1.00  | 1.26  | 1.86 | 2.65 |
| 8                         | miR-1284      | 1.00  | 1.32  | 1.35  | 1.56      | 47                        | miR-320a #           | 1.00  | 1.38  | 1.59 | 1.81 |
| 9                         | miR-1304-5p   | 1.00  | 1.41  | 1.54  | 1.60      | 48                        | miR-34c-5p           | 1.00  | 1.85  | 2.29 | 4.60 |
| 10                        | miR-133b #    | 1.00  | 1.12  | 1.24  | 1.43      | 49                        | miR-376b-3p          | 1.00  | 1.29  | 1.44 | 1.73 |
| 11                        | miR-148a-5p # | 1.00  | 1.06  | 1.57  | 1.66      | 50                        | miR-502-5p           | 1.00  | 1.12  | 1.39 | 2.10 |
| 12                        | miR-148b-3p   | 1.00  | 1.07  | 1.19  | 1.36      | 51                        | miR-518a-5p/ miR-527 | 1.00  | 1.08  | 1.35 | 2.33 |
| 13                        | miR-183-3p    | 1.00  | 1.07  | 1.23  | 1.28      | 52                        | miR-519e-3p          | 1.00  | 1.13  | 1.42 | 2.23 |
| 14                        | miR-198       | 1.00  | 1.33  | 1.77  | 1.93      | 53                        | miR-570-3p #         | 1.00  | 1.76  | 2.33 | 6.40 |
| 15                        | miR-203a      | 1.00  | 1.13  | 1.88  | 1.54      | 54                        | miR-573              | 1.00  | 2.11  | 2.40 | 6.03 |
| 16                        | miR-22-5p     | 1.00  | 1.26  | 2.05  | 2.09      | 55                        | miR-611              | 1.00  | 1.69  | 1.89 | 3.50 |
| 17                        | miR-221-5p    | 1.00  | 1.20  | 1.60  | 1.63      | 56                        | miR-645              | 1.00  | 1.94  | 2.55 | 2.54 |
| 18                        | miR-23a-5p    | 1.00  | 1.28  | 2.11  | 2.24      | Glucose treatment for 48h |                      |       |       |      |      |
| 19                        | miR-29b-1-5p  | 1.00  | 1.43  | 1.58  | 1.61      | 57                        | miR-125b-1-3p #      | 1.00  | 1.12  | 1.22 | 1.57 |
| 20                        | miR-320a #    | 1.00  | 1.27  | 1.44  | 1.76      | 58                        | miR-130b-3p #        | 1.00  | 1.58  | 1.92 | 2.68 |
| 21                        | miR-320b      | 1.00  | 1.13  | 1.22  | 1.39      | 59                        | miR-133a             | 1.00  | 1.14  | 1.38 | 1.81 |
| 22                        | miR-320c      | 1.00  | 1.15  | 1.38  | 1.43      | 60                        | miR-133b #           | 1.00  | 1.01  | 1.13 | 1.70 |







**Table S3.** *In silico* pathway prediction—Independent pathway analysis for miRNAs and mRNAs that are dysregulated in both human IFG/T2DM and rat T2DM model.

| <b>Commonly Upregulated 25 miRNAs in Human T2DM Subjects and Rat T2DM Model</b>   |                                       |               |                         |                        |
|-----------------------------------------------------------------------------------|---------------------------------------|---------------|-------------------------|------------------------|
|                                                                                   | <b>KEGG Pathway</b>                   | <b>miRNAs</b> | <b>Genes</b>            | <b>p-Value</b>         |
| 1                                                                                 | Regulation of actin cytoskeleton      | 25            | 109                     | $1.30 \times 10^{-33}$ |
| 2                                                                                 | Focal adhesion                        | 25            | 99                      | $4.38 \times 10^{-30}$ |
| 3                                                                                 | Endocytosis                           | 25            | 93                      | $8.28 \times 10^{-16}$ |
| 4                                                                                 | Axon guidance                         | 25            | 72                      | $6.01 \times 10^{-29}$ |
| 5                                                                                 | Pathways in cancer                    | 24            | 165                     | $4.72 \times 10^{-39}$ |
| 6                                                                                 | P13K-Akt signaling pathway            | 24            | 154                     | $1.42 \times 10^{-29}$ |
| 7                                                                                 | MAPK signaling pathway                | 24            | 118                     | $7.23 \times 10^{-19}$ |
| 8                                                                                 | Wnt signaling pathway                 | 24            | 81                      | $3.05 \times 10^{-27}$ |
| 9                                                                                 | Ubiquitin mediated proteolysis        | 24            | 68                      | $6.33 \times 10^{-25}$ |
| 10                                                                                | Neurotrophin signaling pathway        | 24            | 65                      | $2.98 \times 10^{-26}$ |
| 11                                                                                | TGF- $\beta$ signaling pathway        | 24            | 55                      | $2.26 \times 10^{-24}$ |
| 12                                                                                | Apoptosis                             | 23            | 53                      | $2.00 \times 10^{-21}$ |
| 13                                                                                | Chronic myeloid leukemia              | 23            | 43                      | $6.76 \times 10^{-18}$ |
| 14                                                                                | Renal cell carcinoma                  | 23            | 40                      | $5.64 \times 10^{-17}$ |
| 15                                                                                | Long term potentiation                | 23            | 40                      | $8.28 \times 10^{-16}$ |
| 16                                                                                | Melanoma                              | 23            | 38                      | $8.28 \times 10^{-16}$ |
| 17                                                                                | Gap junction                          | 21            | 45                      | $1.36 \times 10^{-14}$ |
| 18                                                                                | Gastric acid secretion                | 21            | 39                      | $1.24 \times 10^{-15}$ |
| 19                                                                                | mTOR signaling pathway                | 21            | 37                      | $1.13 \times 10^{-14}$ |
| 20                                                                                | Colorectal cancer                     | 21            | 35                      | $2.96 \times 10^{-15}$ |
| <b>Commonly Downregulated 27 miRNAs in Human T2DM Subjects and Rat T2DM Model</b> |                                       |               |                         |                        |
|                                                                                   | <b>KEGG Pathway</b>                   | <b>miRNAs</b> | <b>Genes</b>            | <b>p-Value</b>         |
| 1                                                                                 | MAPK signaling pathway                | 24            | 130                     | $1.85 \times 10^{-30}$ |
| 2                                                                                 | Neurotrophin signaling pathway        | 24            | 71                      | $1.41 \times 10^{-29}$ |
| 3                                                                                 | Wnt signaling pathway                 | 23            | 84                      | $6.72 \times 10^{-37}$ |
| 4                                                                                 | Apoptosis                             | 23            | 50                      | $6.24 \times 10^{-21}$ |
| 5                                                                                 | P13K-Akt signaling pathway            | 22            | 169                     | $4.80 \times 10^{-64}$ |
| 6                                                                                 | Pathways in cancer                    | 22            | 166                     | $4.18 \times 10^{-42}$ |
| 7                                                                                 | Focal adhesion                        | 22            | 102                     | $2.27 \times 10^{-41}$ |
| 8                                                                                 | Regulation of actin cytoskeleton      | 22            | 101                     | $1.37 \times 10^{-20}$ |
| 9                                                                                 | Ubiquitin mediated proteolysis        | 22            | 68                      | $4.95 \times 10^{-21}$ |
| 10                                                                                | Dopaminergic synapse                  | 22            | 67                      | $1.53 \times 10^{-22}$ |
| 11                                                                                | Prostate cancer                       | 22            | 55                      | $4.55 \times 10^{-23}$ |
| 12                                                                                | Gap junction                          | 22            | 47                      | $1.05 \times 10^{-21}$ |
| 13                                                                                | Phosphatidylinositol signaling system | 22            | 47                      | $2.74 \times 10^{-20}$ |
| 14                                                                                | Insulin signaling system              | 21            | 70                      | $1.30 \times 10^{-28}$ |
| 15                                                                                | Small cell lung cancer                | 21            | 49                      | $1.89 \times 10^{-20}$ |
| 16                                                                                | ErbB signaling pathway                | 21            | 48                      | $5.49 \times 10^{-21}$ |
| 17                                                                                | TGF-beta signaling pathway            | 21            | 47                      | $2.49 \times 10^{-21}$ |
| 18                                                                                | Chronic myeloid leukemia              | 21            | 43                      | $2.05 \times 10^{-19}$ |
| 19                                                                                | Renal cell carcinoma                  | 21            | 41                      | $7.10 \times 10^{-20}$ |
| 20                                                                                | p53 signaling                         | 19            | 44                      | $4.39 \times 10^{-19}$ |
| <b>Top 20 Commonly Dysregulated mRNA Pathways in Human IFG and T2DM Subjects</b>  |                                       |               |                         |                        |
|                                                                                   | <b>KEGG Pathway</b>                   | <b>Genes</b>  | <b>p-Value</b>          |                        |
| 1                                                                                 | Metabolic pathways                    | 868           | $5.67 \times 10^{-236}$ |                        |
| 2                                                                                 | P13K-Akt signaling pathway            | 283           | $3.06 \times 10^{-100}$ |                        |
| 3                                                                                 | MAPK signaling pathway                | 267           | $2.66 \times 10^{-65}$  |                        |

---

|    |                                  |     |                        |
|----|----------------------------------|-----|------------------------|
| 4  | Insulin signaling pathway        | 260 | $4.09 \times 10^{-94}$ |
| 5  | Apoptosis                        | 259 | $4.36 \times 10^{-89}$ |
| 6  | Chemokine signaling pathway      | 254 | $4.45 \times 10^{-86}$ |
| 7  | Focal adhesion                   | 192 | $7.13 \times 10^{-68}$ |
| 8  | Regulation of actin cytoskeleton | 199 | $2.16 \times 10^{-64}$ |
| 9  | Oxidative phosphorylation        | 189 | $1.83 \times 10^{-62}$ |
| 10 | ErbB signaling pathway           | 180 | $4.58 \times 10^{-62}$ |
| 11 | Calcium signaling pathway        | 171 | $6.05 \times 10^{-62}$ |
| 12 | Adherens junction                | 163 | $6.71 \times 10^{-46}$ |
| 13 | VEGF signaling pathway           | 151 | $1.04 \times 10^{-48}$ |
| 14 | Type II diabetes mellitus        | 153 | $4.35 \times 10^{-60}$ |
| 15 | Wnt-signaling pathway            | 147 | $3.91 \times 10^{-56}$ |
| 16 | TGF-beta signaling pathway       | 146 | $8.91 \times 10^{-51}$ |
| 17 | Neurotrophin signaling pathway   | 130 | $1.13 \times 10^{-46}$ |
| 18 | mTOR signaling pathway           | 121 | $3.85 \times 10^{-42}$ |
| 19 | Long-term potentiation           | 127 | $1.71 \times 10^{-44}$ |
| 20 | Tight junction                   | 83  | $2.01 \times 10^{-29}$ |

---

**Table S4.** Human mRNA microarray (Adapted from Karolina *et al.*; Reference [20] in the main text) mRNAs with background subtracted mean signal intensities  $\geq 300$  are included. Some of the mRNAs dysregulated in IFG and T2DM patients are shown. Data are expressed as fold changes.

| mRNA  | 1 IFG  | 2 IFG  | 3 IFG  | 4 IFG  | 5 IFG  | 1 T2D  | 2 T2D  | 3 T2D  | 4 T2D  | 5 T2D | 6 T2D  | 7 T2D  | 8 T2D  |
|-------|--------|--------|--------|--------|--------|--------|--------|--------|--------|-------|--------|--------|--------|
| NOS3  | -3.01  | -3.06  | -3.11  | -3.00  | -3.12  | -3.06  | -3.02  | -3.14  | -3.09  | -3.03 | -3.21  | -3.15  | -3.07  |
| EDN1  | 3.26   | 3.34   | 3.35   | 3.22   | 3.28   | 3.37   | 3.33   | 3.07   | 3.03   | 3.16  | 3.11   | 3.18   | 3.20   |
| ERG   | -3.08  | -3.25  | -3.28  | -3.18  | -3.28  | -3.27  | -3.16  | -3.31  | -3.33  | -3.35 | -3.33  | -3.32  | -3.11  |
| VEGFA | 1.50   | 1.27   | 1.66   | 1.48   | 1.64   | 1.44   | 1.51   | 1.43   | 1.28   | 1.6   | 1.34   | 1.33   | 1.33   |
| RHOA  | 52.20  | 41.97  | 56.34  | 39.46  | 69.9   | 41.77  | 47.4   | 43.06  | 43.67  | 46.74 | 39.65  | 47.51  | 45.20  |
| ROCK2 | 377.73 | 312.76 | 521.40 | 297.16 | 513.38 | 442.63 | 519.69 | 254.48 | 331.87 | 277.6 | 276.42 | 304.67 | 387.21 |
| CCL5  | 210.81 | 189.76 | 175.84 | 184.57 | 209.19 | 137.59 | 230.71 | 148.52 | 140.59 | 191.3 | 150.21 | 197.4  | 160.80 |
| TLR4  | 4.01   | 2.95   | 4.61   | 3.09   | 4.82   | 2.14   | 3.21   | 3.83   | 3.13   | 4.82  | 3.52   | 3.91   | 2.50   |
| NFKB1 | 42.69  | 31.34  | 43.28  | 27.30  | 46.26  | 30.14  | 32.8   | 33.43  | 34.54  | 34.01 | 32.93  | 32.15  | 32.78  |
| IL1B  | 22.58  | 11.07  | 13.26  | 8.59   | 17.30  | 8.12   | 9.05   | 15.00  | 14.80  | 14.32 | 12.34  | 14.89  | 11.71  |
| BNIP3 | 2.72   | 2.27   | 2.99   | 2.09   | 2.90   | 2.92   | 3.75   | 1.93   | 1.63   | 3.61  | 2.29   | 2.07   | 2.58   |
| DNM1L | 2.32   | 1.70   | 2.55   | 1.88   | 2.46   | 2.05   | 3.01   | 1.79   | 1.90   | 2.76  | 2.38   | 1.78   | 2.06   |
| BCL2  | -5.64  | -4.31  | -5.42  | -4.46  | -4.62  | -7.05  | -6.94  | -7.02  | -7.42  | -8.60 | -8.49  | -8.16  | -8.43  |
| MCL1  | -8.31  | -8.39  | -8.13  | -8.38  | -8.89  | -10.92 | -10.89 | -10.35 | -10.26 | -10.4 | -10.39 | -10.59 | -10.55 |
| CASP3 | 9.37   | 7.29   | 8.97   | 8.23   | 7.85   | 9.07   | 8.93   | 8.7    | 6.81   | 14.47 | 7.18   | 8.53   | 5.88   |

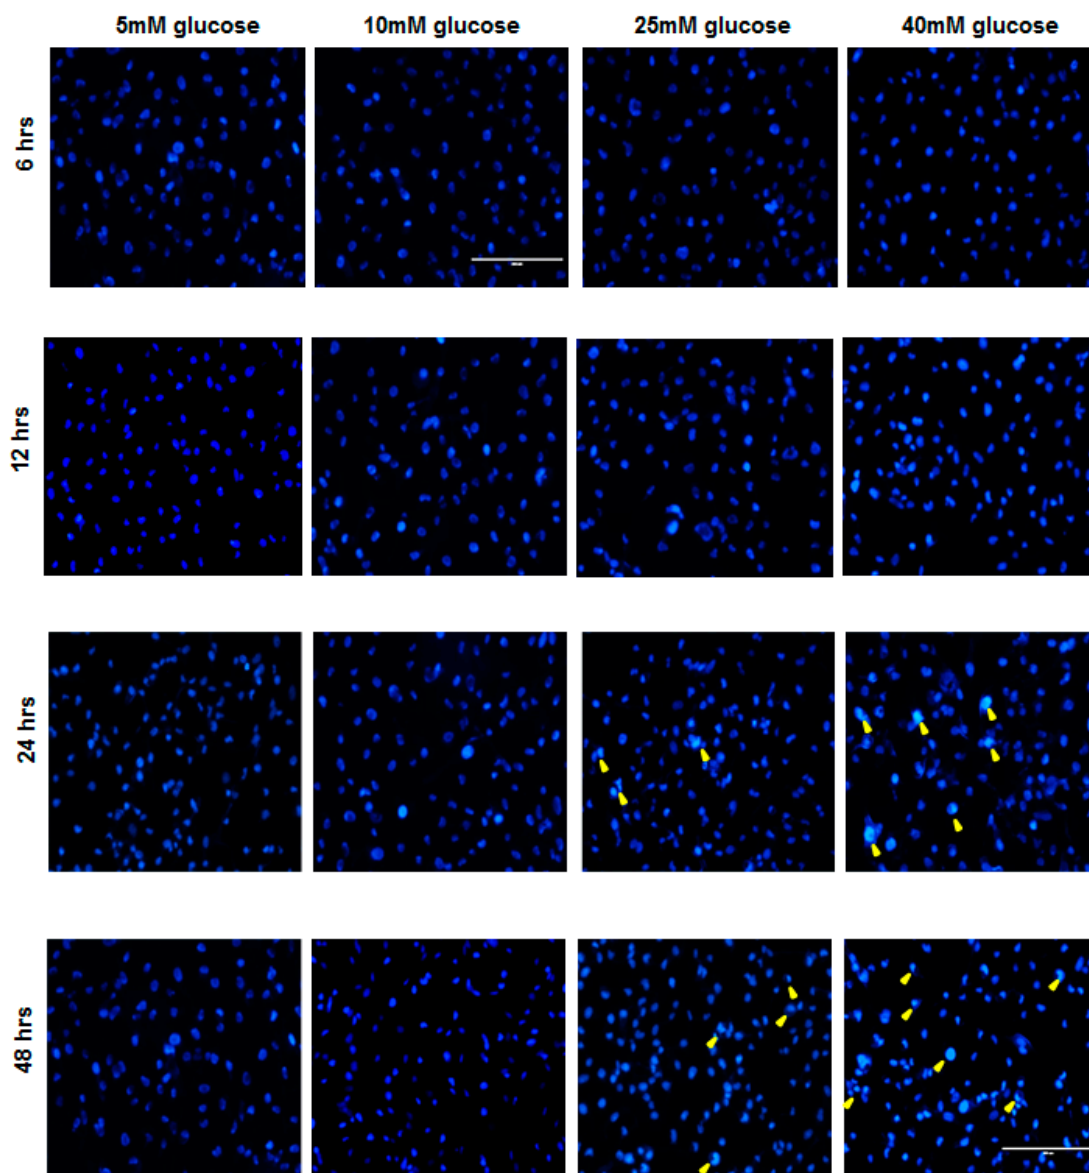

**Figure S1.** Fluorescence microscopy for DAPI nuclear staining. Cells were subjected to different glucose treatments (5–40 mM) and collected at various time-points (6–48 h). The images were captured using Olympus IX51 microscope (objective 20× magnification). Healthy nuclei can be observed for 5 mM glucose treatments (6, 12, 24 and 48 h). A significant amount of shrunken/condensed and pyknotic nuclei can be seen only under hyperglycemic conditions (24 and 48 h).



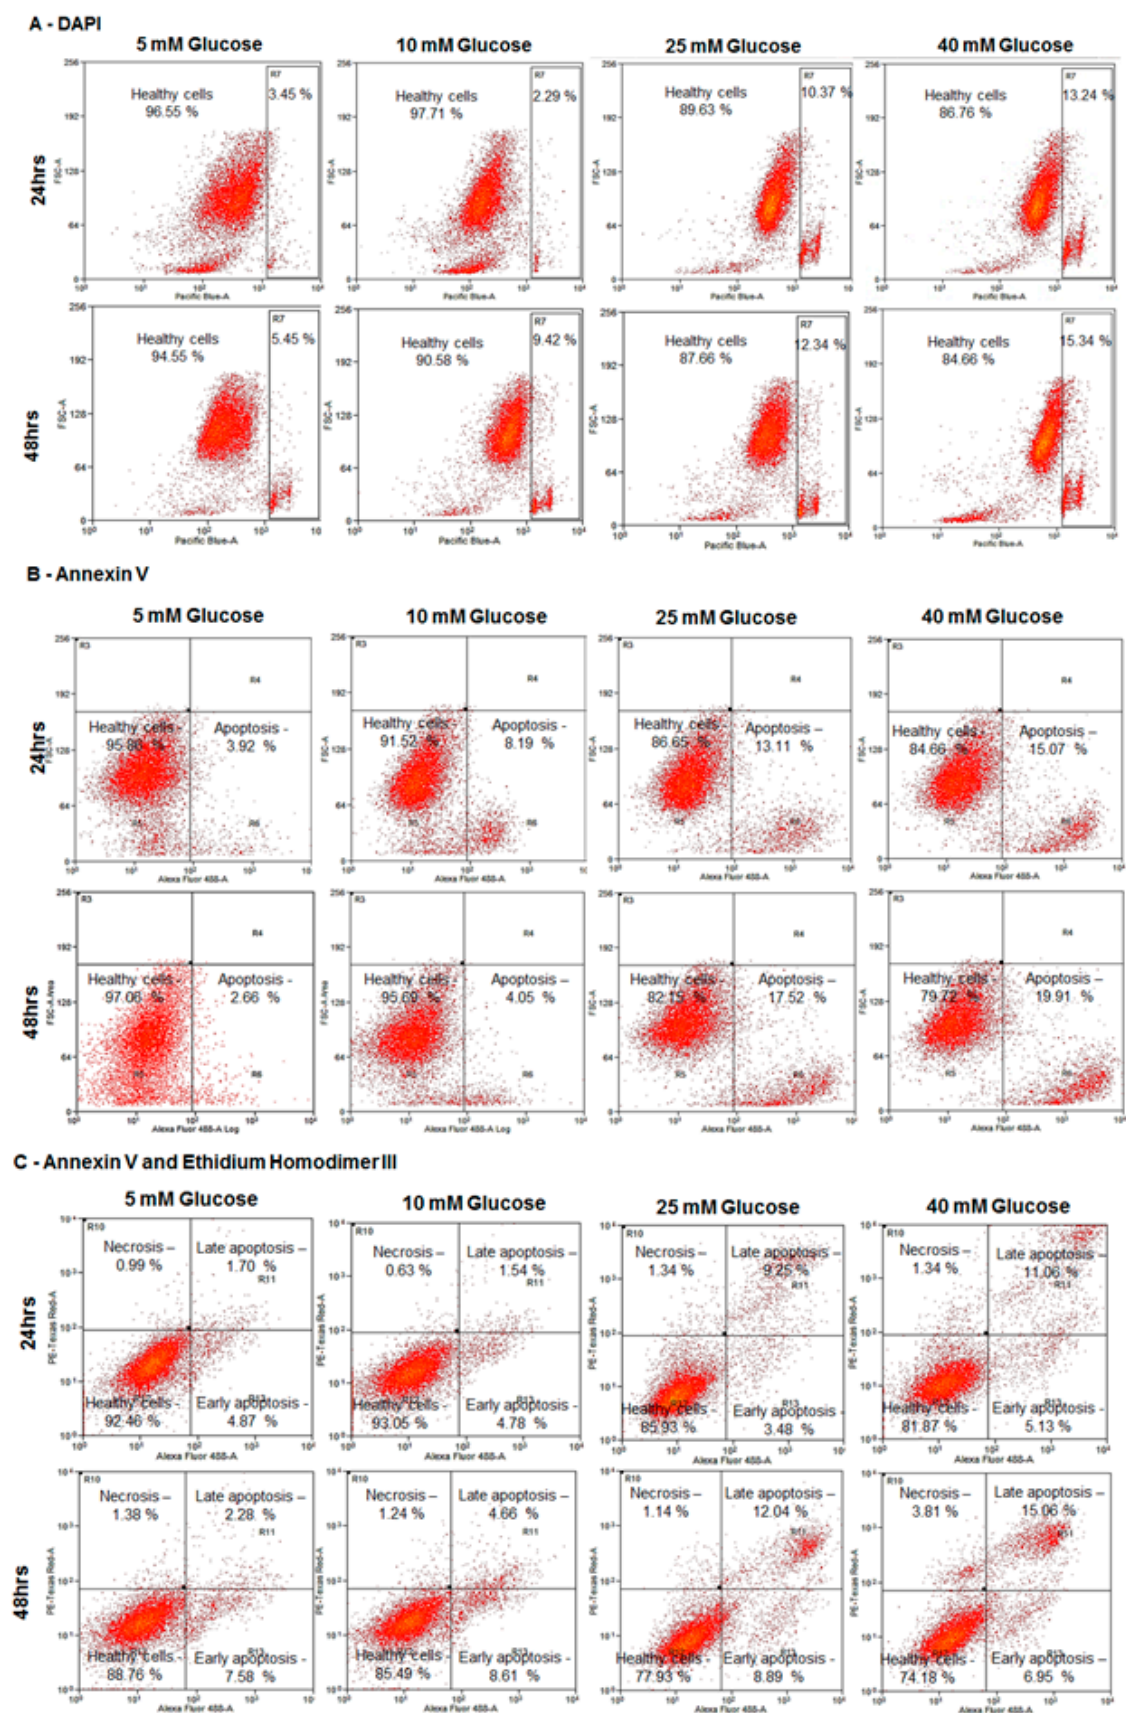

**Figure S2.** Fluorescence activated cell sorting (FACS). Cells were subjected to different glucose treatments (5–40 mM) and collected at various time-points (6–48 h). Dot-plot graph on FACS for cells stained with (A) DAPI (B) Annexin V (C) Annexin V and Ethidium Homodimer staining. The percentages of healthy and apoptotic cells are indicated in their respective quadrants.

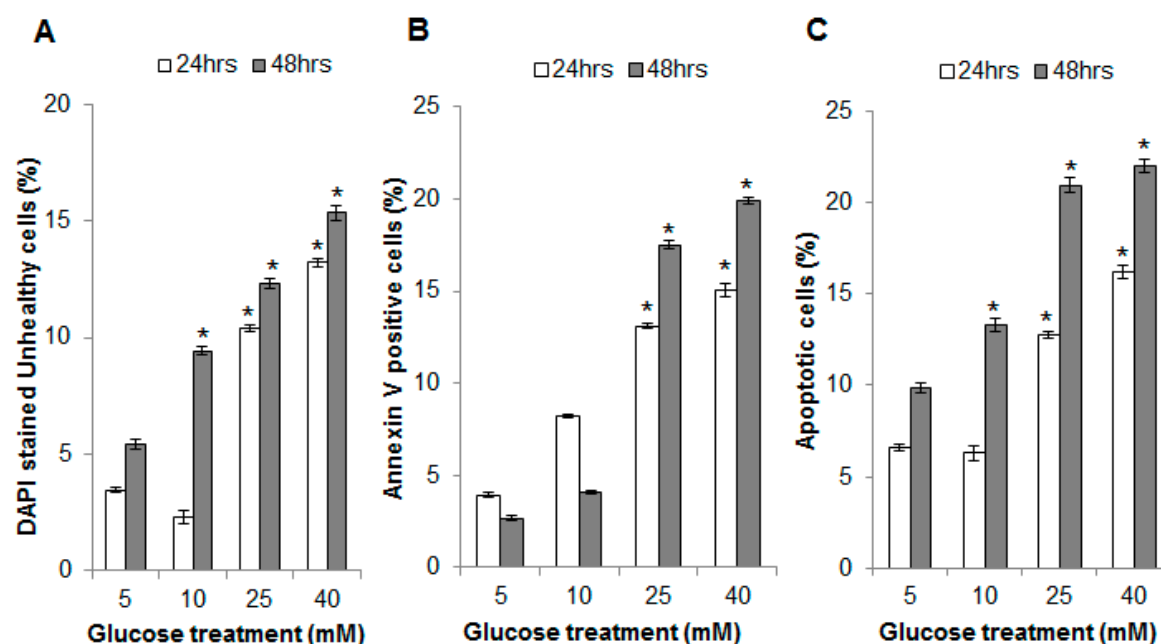

| Fluorescence Associated Cell Sorting (FACS) – Statistical analysis |                                  |       |                  |       |                              |       |                  |       |                                                          |       |                  |       |
|--------------------------------------------------------------------|----------------------------------|-------|------------------|-------|------------------------------|-------|------------------|-------|----------------------------------------------------------|-------|------------------|-------|
| Treatment                                                          | DAPI stained Unhealthy cells (%) |       | t-test (p-value) |       | Annexin V positive cells (%) |       | t-test (p-value) |       | Annexin V and Ethidium Homo dimer III positive cells (%) |       | t-test (p-value) |       |
|                                                                    | 24hrs                            | 48hrs | 24hrs            | 48hrs | 24hrs                        | 48hrs | 24hrs            | 48hrs | 24hrs                                                    | 48hrs | 24hrs            | 48hrs |
| 5mM glucose                                                        | 3.45                             | 5.45  | NA               | NA    | 3.92                         | 2.66  | NA               | NA    | 6.57                                                     | 9.86  | NA               | NA    |
| 10mM glucose                                                       | 2.29                             | 9.42  | 0.056            | 0.000 | 8.19                         | 4.05  | 0.000            | 0.000 | 6.32                                                     | 13.27 | 0.002            | 0.000 |
| 25mM glucose                                                       | 10.37                            | 12.34 | 0.000            | 0.000 | 13.11                        | 17.52 | 0.000            | 0.000 | 12.73                                                    | 20.93 | 0.000            | 0.000 |
| 40mM glucose                                                       | 13.24                            | 15.34 | 0.000            | 0.000 | 15.07                        | 19.91 | 0.000            | 0.000 | 16.19                                                    | 22.01 | 0.000            | 0.000 |

**Figure S3.** Statistical analysis of FACS study: The percentage of apoptosis at 25 and 40 mM glucose treatments are statistically significant compared to 5mM glucose control. (A) Percentage of DAPI stained cells unhealthy (R7 quadrant, Figure S2A); (B) Percentage of Annexin V positive cells (R6 quadrant, Figure S2B); (C) Percentage of Annexin V positive and Ethidium Homo dimer III stained cells (R11 and R13 quadrants, Figure S2C). Data presented as mean ± SEM (n = 3). \*: Indicates statistical significance,  $p < 0.05$ .

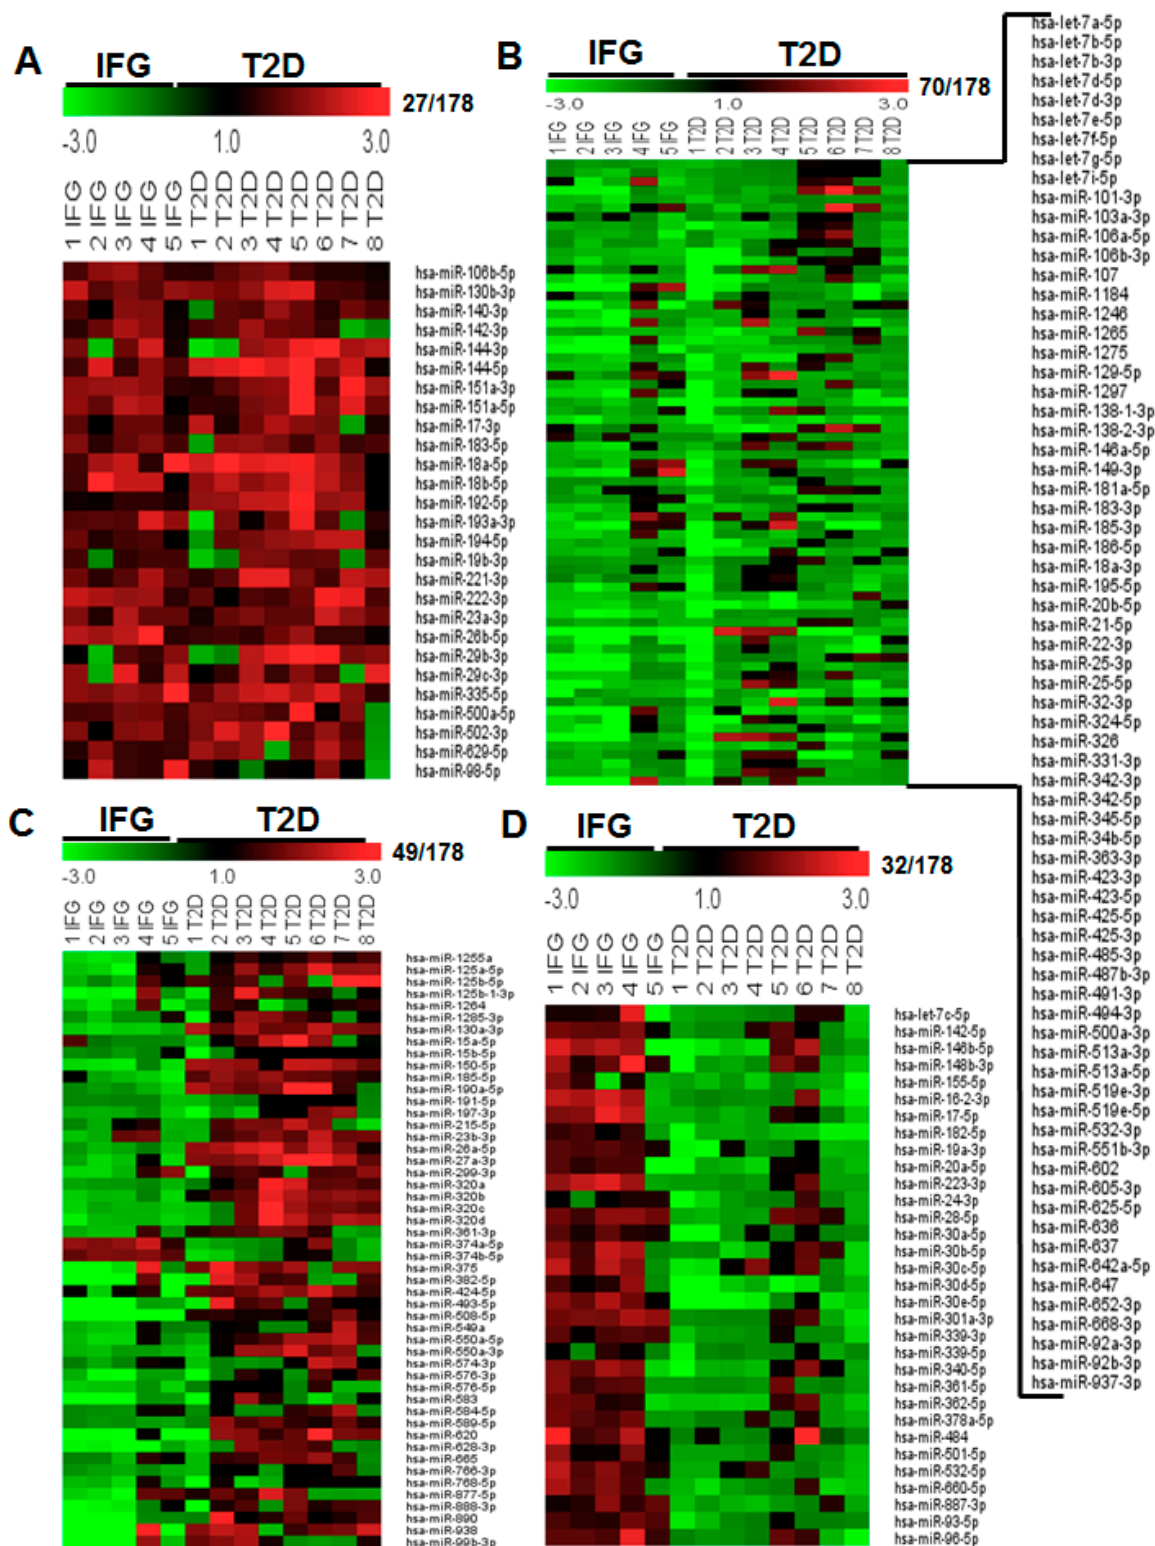

**Figure S4.** Categorization of 177 human microRNA expression profile based on IFG and T2DM. miRNAs with background subtracted mean signal intensities  $\geq 300$  are included. Heat map of selected miRNAs dysregulated in human T2DM. miRNAs that showed differential expression are grouped into 4 categories (A–D). miRNAs that remained: (A) upregulated in both IFG and T2DM against controls; (B) downregulated in both IFG and T2DM; (C) downregulated in IFG but upregulated in T2DM; (D) upregulated in IFG but downregulated in T2DM. Data are expressed as fold change. Red represents up-regulation; green indicates down-regulation and grey—not detected.
